# Supplementary material for: High Psychopathology Subgroup in Young Children With Autism: Associations With Biological Sex and Amygdala Volume
Source: PubMed Central journal article supplement — J Am Acad Child Adolesc Psychiatry. Author manuscript; Available in PMC 2021 Dec 1. (PMC7369216; doi:10.1016/j.jaac.2019.11.022), 2020-01-20
Supplement: NIHMS1569248-supplement-1.pdf [file NIHMS1569248-supplement-1.pdf]

**TABLE S1** Participant Characteristics on Race and Parental Education

|                                                              | ASD-F | ASD-M | TD-F | TD-M |
|--------------------------------------------------------------|-------|-------|------|------|
| Participants, n                                              | 91    | 209   | 57   | 63   |
| Race <sup>a</sup> (% of total)                               |       |       |      |      |
| White                                                        | 66.3  | 67.9  | 77.1 | 75.9 |
| Nonwhite                                                     | 16.9  | 13.4  | 6.3  | 5.2  |
| ≥2 Races reported                                            | 14.6  | 15.3  | 16.7 | 17.2 |
| Unknown/not reported                                         | 2.3   | 3.4   | 0.0  | 1.7  |
| Maternal Education <sup>b</sup> (% college degree or higher) | 46.8  | 47.3  | 76.1 | 64.8 |
| Paternal Education <sup>c</sup> (% college degree or higher) | 40.0  | 41.9  | 54.3 | 46.3 |

**Note:** Table S1 provides additional participant characteristics regarding race and parental education, reported on a subset of participants. There were no significant differences between groups on race or paternal education, but there was a significant difference between groups on maternal education. A higher proportion of typically developing (TD) females had mothers with a college education or higher. To account for this potential confounder in analyses comparing right amygdala volume of each LPA subgroup relative to TD controls, additional models were run in the subset of participants with maternal education reported and magnetic resonance imaging data ( $n = 306$ ) and amygdala volume reported. Maternal education was not associated with amygdala volume ( $p = .92$ ). ASD-F = female participant with ASD; ASD-M = male participant with ASD; TD-F = typically developing female participant; TD-M = typically developing male participant.

<sup>a</sup>404/420 Total participants (96%) reported race/ethnicity; racial categories include white, African American, Asian, Pacific Islander or Native Hawaiian, American Indian/Alaska Native, and other. There were no significant group differences by race ( $\chi^2$  test,  $p > .30$ ).

<sup>b</sup>365/420 Total participants (87%) reported maternal education. Groups differed on maternal education ( $\chi^2$  test,  $p < .01$ ), with a higher proportion of mothers of TD female participants having a college education or higher than in other groups.

<sup>c</sup>364/420 Total participants (87%) reported paternal education. There were no significant group differences by race ( $\chi^2$  test,  $p > .30$ ).

**TABLE S2** Scores by Latent Profile Analysis (LPA) Subgroup and Sex

|                                           | High Psychopathology<br>Moderate Impairments |             | Low Psychopathology<br>Higher Impairments |             | Low Psychopathology<br>Lower Impairments |             |
|-------------------------------------------|----------------------------------------------|-------------|-------------------------------------------|-------------|------------------------------------------|-------------|
|                                           | ASD-F                                        | ASD-M       | ASD-F                                     | ASD-M       | ASD-F                                    | ASD-M       |
| Participants, n                           | 36                                           | 46          | 27                                        | 70          | 28                                       | 93          |
| CBCL DSM                                  |                                              |             |                                           |             |                                          |             |
| Depressive Problems                       | 72.2 (9.4)                                   | 69.6 (7.3)  | 62.5 (8.0)                                | 60.6 (7.2)  | 58.3 (8.6)                               | 58.2 (7.8)  |
| Anxiety Problems                          | 65.5 (10.7)                                  | 65.6 (10.7) | 54.4 (6.8)                                | 52.3 (4.1)  | 55.4 (7.7)                               | 54.9 (8.1)  |
| Attention-Deficit/ Hyperactivity Problems | 68.9 (6.1)                                   | 64.9 (6.7)  | 59.3 (7.6)                                | 58.3 (6.8)  | 55.1 (6.3)                               | 56.6 (6.1)  |
| Oppositional Defiant Problems             | 66.0 (8.7)                                   | 68.4 (6.5)  | 53.0 (5.8)                                | 52.8 (4.3)  | 51.3 (2.8)                               | 56.3 (7.6)  |
| VABS Subscales                            |                                              |             |                                           |             |                                          |             |
| Daily Living Skills                       | 74.0 (8.6)                                   | 74.8 (8.6)  | 65.1 (6.8)                                | 69.5 (8.1)  | 87.8 (10.9)                              | 88.2 (10.3) |
| Communication                             | 67.5 (11.0)                                  | 69.3 (11.7) | 59.3 (11.3)                               | 60.3 (11.5) | 88.0 (11.4)                              | 84.8 (11.8) |
| Socialization                             | 67.9 (8.7)                                   | 69.6 (8.1)  | 63.6 (6.6)                                | 66.3 (6.9)  | 82.6 (8.8)                               | 84.1 (9.6)  |
| Motor Skills                              | 82.2 (10.8)                                  | 84.4 (11.9) | 79.9 (15.0)                               | 81.5 (11.1) | 88.9 (13.0)                              | 94.3 (11.1) |
| DQ                                        | 62.8 (19.5)                                  | 62.7 (19.5) | 46.2 (11.3)                               | 45.9 (10.3) | 81.1 (18.7)                              | 74.9 (19.3) |
| ADOS CSS                                  | 7.0 (1.6)                                    | 7.3 (1.8)   | 8.2 (1.5)                                 | 8.3 (1.4)   | 7.4 (2.0)                                | 7.3 (1.8)   |

**Note:** LPA subgroup membership was determined for each child using maximum probability assignment. Data are summarized as mean (SD). ASD-F = female participant with ASD; ASD-M = male participant with ASD; CBCL = Child Behavior Checklist; VABS = Vineland Adaptive Behavior Scales; DQ = Developmental Quotient; ADOS-CSS = Autism Diagnostic Observation Scale–Calibrated Severity Score.

**TABLE S3** Magnetic Resonance Imaging (MRI) Subsample and Volumetric Measurements

|                                               | <b>ASD-F</b>  | <b>ASD-M</b>  | <b>TD-F</b>  | <b>TD-M</b>   |
|-----------------------------------------------|---------------|---------------|--------------|---------------|
| Participants, n                               | 73            | 153           | 57           | 63            |
| Age at MRI, mo                                | 39.0 (6.3)    | 37.9 (6.0)    | 38.9 (6.8)   | 36.8 (5.9)    |
| Interval between MRI and behavior testing, mo | 2.1 (1.6)     | 2.6 (2.6)     | 2.3 (1.7)    | 2.2 (1.4)     |
| Right amygdala volume, cm <sup>3</sup>        | 1.64 (0.19)   | 1.78 (0.17)   | 1.57 (0.16)  | 1.70 (0.14)   |
| Left amygdala volume, cm <sup>3</sup>         | 1.47 (0.17)   | 1.61 (0.16)   | 1.45 (0.13)  | 1.56 (0.15)   |
| Total cerebral volume, cm <sup>3</sup>        | 992.8 (108.3) | 1072.7 (86.7) | 965.4 (70.6) | 1029.9 (84.3) |

**Note:** Data are summarized as mean (SD). ASD-F = female participant with ASD; ASD-M = male participant with ASD; ASD, = autism spectrum disorder; TD-F = typically developing female participant; TD-M = typically developing male participant.
